# Supplementary material for: Aqueous graphene oxide-dispersed carbon nanotubes as inks for the scalable production of all-carbon transparent conductive films
Source: Royal Society of Chemistry journal article supplement (doi:10.1039/c6tc01224h), 2016-01-01
Supplement: c6tc01224h1.pdf [file c6tc01224h1.pdf]

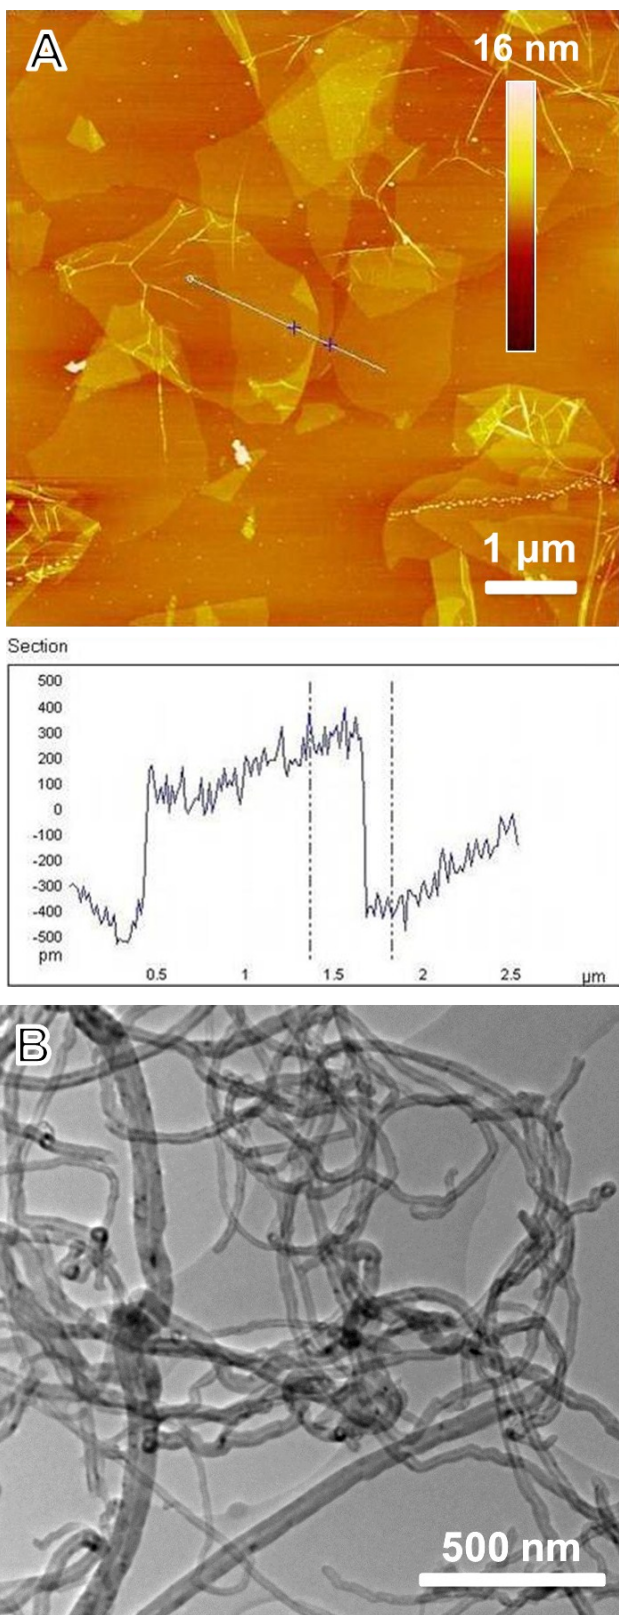

Figure S1 A) AFM image of as-synthesized GOs (on freshly cleaved mica). B) TEM micrograph of MWNTs used in this study.

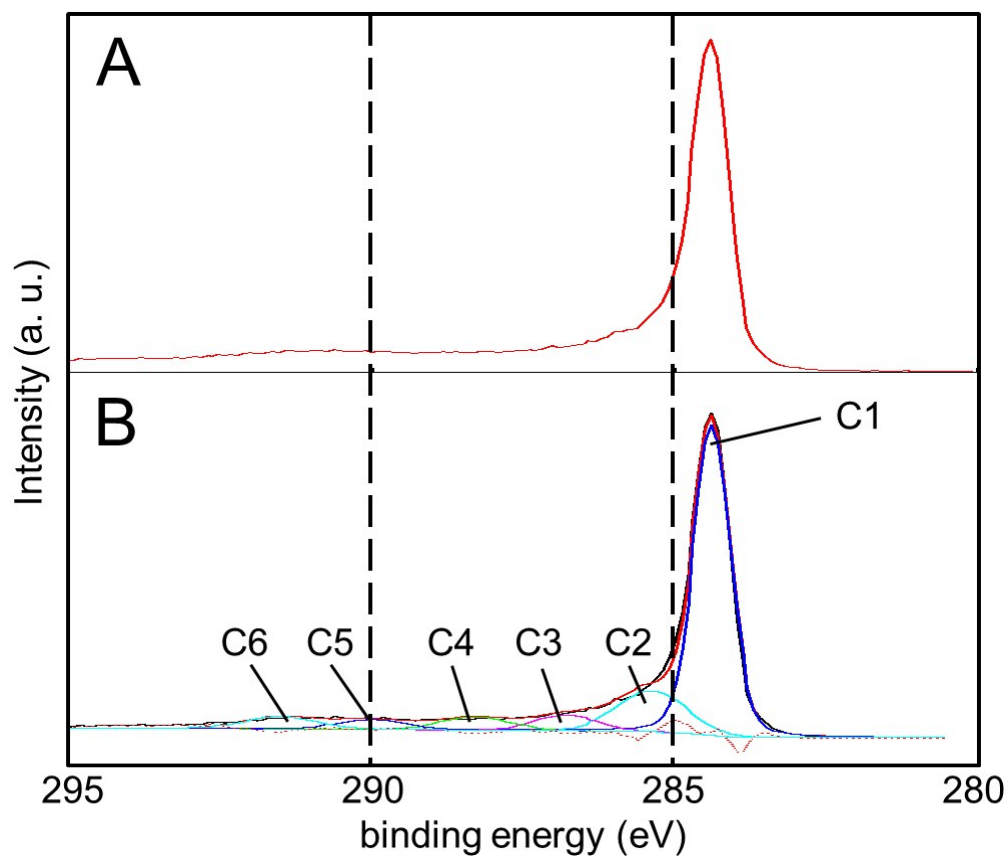

Figure S2 A) XPS C-1s spectrum of carboxyl functionalized MWNTs and B) the deconvolution of C1s peak into six peaks: C1~C6. C1 (284.3 eV) and C2 (285.5 eV) correspond to  $sp^2$ - (C=C) and  $sp^3$ -hybridized carbon (C-C), respectively; C3~C5 (286.7 eV, 288.3 eV and 290.0 eV) correspond to C-O, C=O and -COO- group, respectively. C6 (291.4 eV) is due to the  $\pi-\pi^*$  transition.
